# Supplementary material for: Bulk graphdiyne powder applied for highly efficient lithium storage
Source: Royal Society of Chemistry journal article supplement (doi:10.1039/c4cc08706b), 2014-12-10
Supplement: c4cc08706b1.pdf [file c4cc08706b1.pdf]

# Bulk graphdiyne powder applied for highly efficient lithium storage

Shengliang Zhang,<sup>ab</sup> Huibiao Liu,<sup>c</sup> Changshui Huang,<sup>\*a</sup> Guanglei Cui<sup>\*a</sup> and Yuliang Li<sup>\*c</sup>

<sup>a</sup> *Qingdao Institute of Bioenergy and Bioprocess Technology, Chinese Academy of Sciences, No. 189 Songling Road, 266101, Qingdao, China.*

*E-mail: huangcs@qibebt.ac.cn, cuigl@qibebt.ac.cn, ylli@iccas.ac.cn.*

<sup>b</sup> *University of Chinese Academy of Sciences, No. 19A Yuquan Road, 100049, Beijing, China.*

<sup>c</sup> *Institute of Chemistry, Chinese Academy of Sciences, 100190, Beijing, China.*

## Methods

**Synthesis of GDY powders.** Copper powder was washed with 4 M HCl (100 mL), sonicated for 3 min, washed with water and EtOH, sonicated for 3 min, washed twice with acetone, and dried under N<sub>2</sub>. Washed copper powder and pyridine (50 mL) were charged in a three-neck flask; the mixture was heated at 120 °C under N<sub>2</sub> for 1 h and then the temperature was decreased to 80 °C. Hexakis[(trimethylsilyl)ethynyl]benzene (200 mg) was dissolved in THF (50 mL) in an ice bath (ice and NH<sub>4</sub>Cl) and purged with N<sub>2</sub> for 30 min. 1 MTBAF in THF (2.5 mL) was added under N<sub>2</sub> and then the mixture was stirred for 15 min at this low temperature (generally, the solution should be purple; it is related to the quality of the TBAF solution). The reaction mixture was diluted with EtOAc, washed three times with saturated NaCl, dried (MgSO<sub>4</sub>), and filtered. The solvent was evaporated under vacuum while maintaining the temperature below 30 °C. (The deprotected compound should be processed in dark, rapidly, and at low temperature to avoid its decomposition). The residue was dissolved in pyridine (50 mL), transferred to a N<sub>2</sub>-protected constant addition funnel, and added dropwise into the mixture containing pyridine (50 mL) and copper powder at 80 °C (step2); this addition process lasted for 8 h. The entire process, from deprotection to addition, should be continuous and rapid to avoid contact with oxygen. After addition of the

deprotected compound, the reaction mixture was maintained at 120 °C for 3 days. Upon completion of the reaction, the pyridine was evaporated under reduced pressure. The crude products were washed sequentially with acetone and hot (80 °C) DMF. The combined crude product was washed with hot DMF to remove oligomers. The solid was heated sequentially under reflux at 100 °C for 8 h in 4 M NaOH, 6 M HCl, and 4 M NaOH to remove silicon and copper. The crude product was collected through centrifugation, washed sequentially with hot DMF (80 °C) and hot (70 °C) EtOH, and then dried.

**Materials characterization.** Morphological information was obtained using field emission scanning electron microscopy (FESEM, HITACHI S-4800) and transmission electron microscope (TEM, JEOL 2010F). Raman spectra were recorded at room temperature using an Thermo Scientific DXRxi system with excitation from an Ar laser at 532 nm. The X-Ray photoelectron spectrometer (XPS) was collected on VG Scientific ESCALab220i-XL X-Ray photoelectron spectrometer, using Al Ka radiation as the excitation sources. Nitrogen adsorption/desorption measurements were performed at 77 K using a Quantachrome Autosorb gas-sorption system.

**Electrochemical measurements.** The electrochemical experiments were performed in 2032 coin-type cells. The electrodes were prepared by mixing 70 wt % GDY with 20 wt % Super P and 10 wt % polytetrafluoroethylene (PTFE) binders. The obtained GDY-based electrode samples were rolled into slices and cut into square pieces of 0.5 cm × 0.5 cm (typically 2.0 mg/cm<sup>2</sup>), then pasted on a stainless steel current-collector under a pressure of 15 MPa, followed with dried in vacuum oven at 120 °C for 4 h, used as the working electrode. Pure Li foil was used as the counter electrode, which was separated from the working electrode by a Celgard 2500 polymeric separator. The electrolyte was 1 M LiPF<sub>6</sub> in EC/DMC/DEC (1:1:1, v/v/v) containing 5% (by volume) VC. The cells were assembled in an argon-filled glovebox with the concentrations of moisture and oxygen at less than 1ppm. The galvanostatic charge/discharge cycling performance was measured using a LAND battery testing

system in the voltage range from 5 mV to 3 V vs Li/Li<sup>+</sup>. Cyclic voltammetry (CV) was performed using an IM6 electrochemical workstation between 5 mV and 3 V vs Li/Li<sup>+</sup> at a scan rate of 0.1 mV/s. Electrochemical impedance spectroscopy (EIS) was performed over frequencies ranging from 100 kHz to 100 mHz. The capacity was calculated based on the mass of GDY.

### Results and discussion.

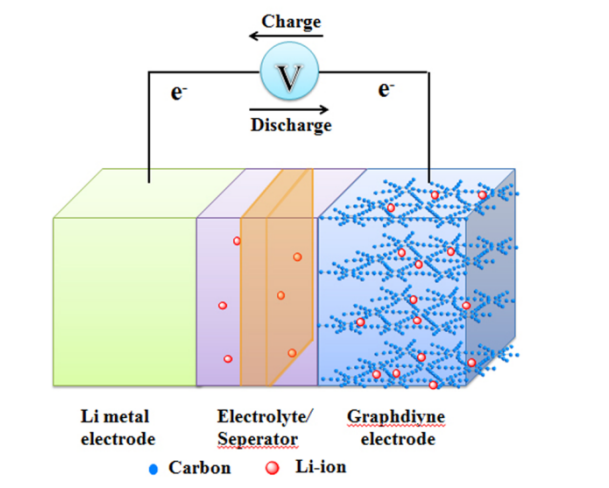

Fig. S1 Schematic representation of an assembled GDY-based battery

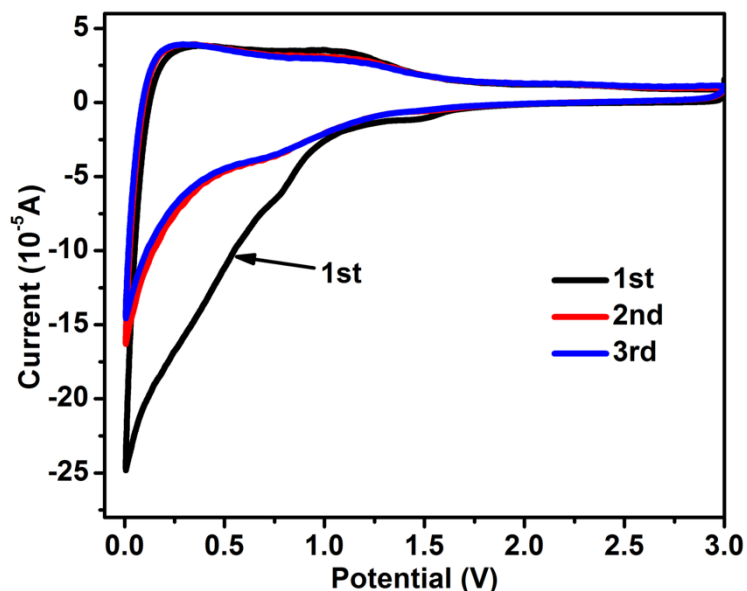

Fig. S2 Cyclic voltammogram (CV) profiles of GDY based electrode at a scan rate of 0.1 mV/s.

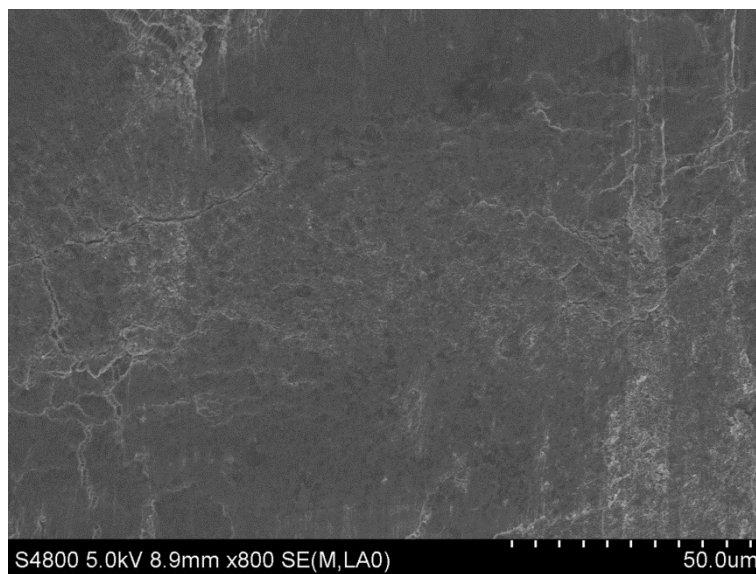

Fig. S3 The SEM images of GDY-based electrode before cycles.

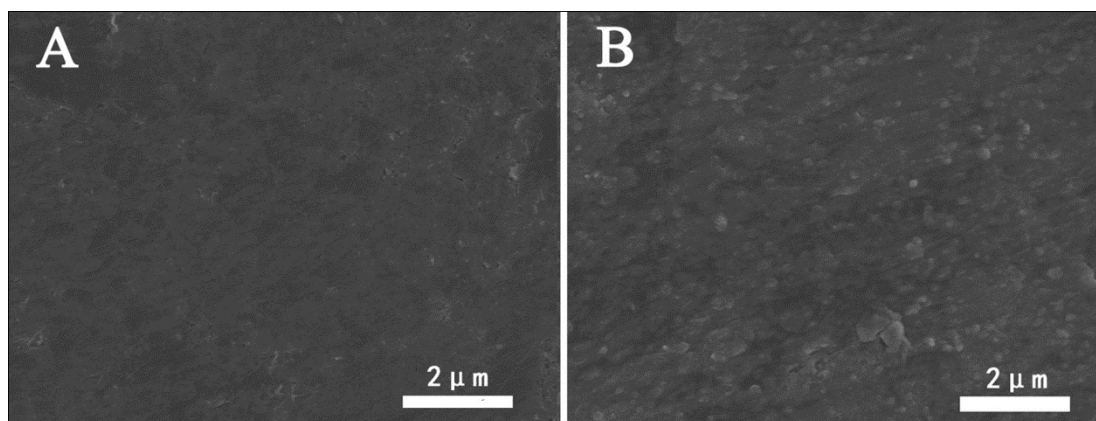

Fig. S4 The SEM images of GDY electrode before (A) and after 200 cycles (B) at a current density of 200 mA/g.

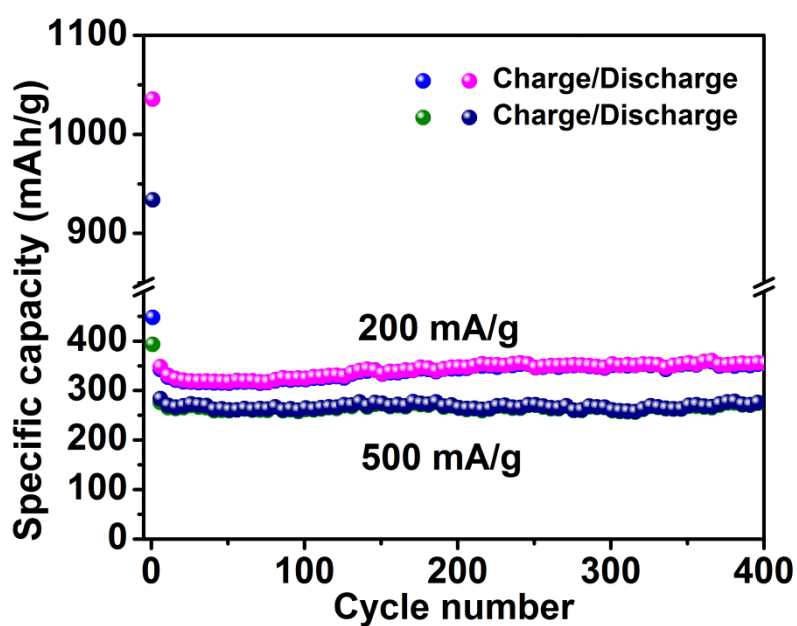

Fig. S5 Cycle performance of GDY electrodes under 200 and 500 mA/g, respectively.

| Samples          | Before cycles | After cycles |
|------------------|---------------|--------------|
| Re ( $\Omega$ )  | 2.698         | 3.149        |
| Rct ( $\Omega$ ) | 44.31         | 81.4         |

Table S1 Kinetic parameters of GDY electrode before and after 200 cycles.

In the equivalent circuit, where  $R_e$  represents the electrolyte resistance,  $R_{SEI}$  and  $CPE1$  are the resistance and capacitance, respectively, of the solid electrolyte interface (SEI) formed on the electrode,  $R_{ct}$  and  $CPE2$  represent the charge-transfer resistance and the double layer capacitance, respectively, and  $Z_w$  is the Warburg impedance related to the diffusion of lithium ions into the bulk electrode.
